# Supplementary material for: Diastereoselective self-assembly of a triple-stranded europium helicate with light modulated chiroptical properties
Source: Royal Society of Chemistry journal article supplement (doi:10.1039/d1dt00251a), 2021-01-01
Supplement: d1dt00251a1.pdf [file d1dt00251a1.pdf]

## Supplementary Information

### Diastereoselective self-assembly of a triple-stranded europium helicate with light modulated chiroptical property

Zhihui Zhang, Yanyan Zhou, Ting Gao, Pengfei Yan, Xiaoyan Zou\* and Hongfeng Li\*

Key Laboratory of Functional Inorganic Material Chemistry, Ministry of Education, P. R. China; School of Chemistry and Materials Science, Heilongjiang University, Harbin 150080, P. R. China.

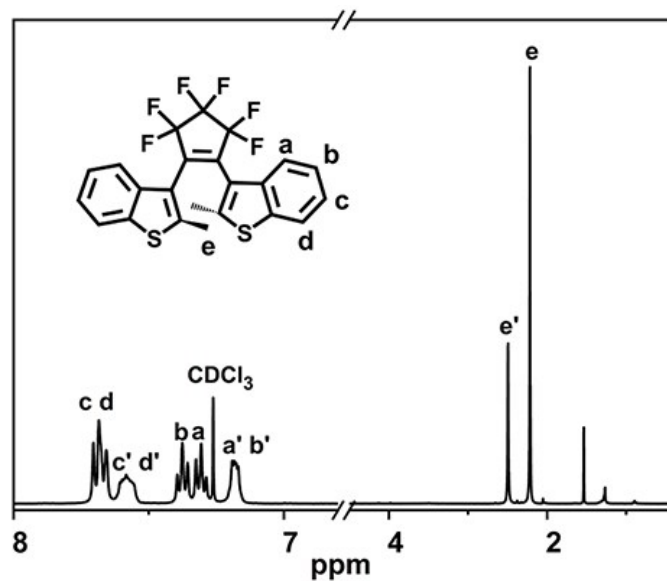

Figure S1.  $^1\text{H}$  NMR spectrum of **3** in  $\text{CDCl}_3$ .

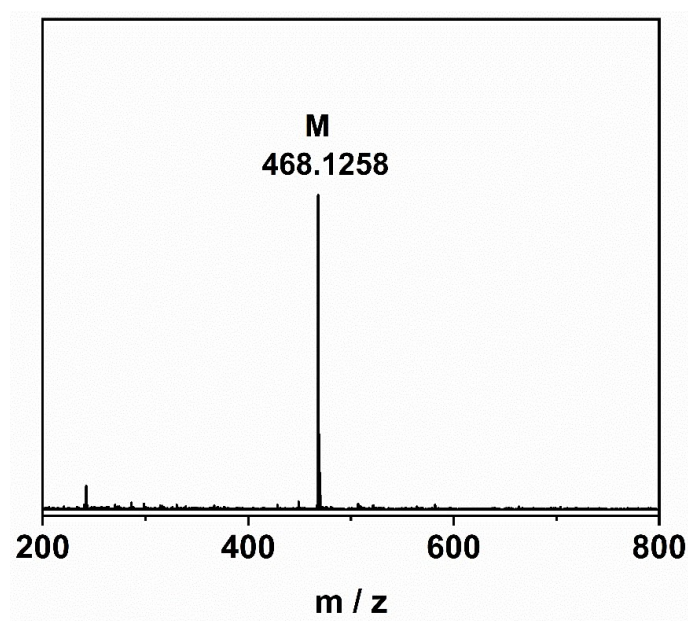

Figure S2. ESI-MS of **3**.

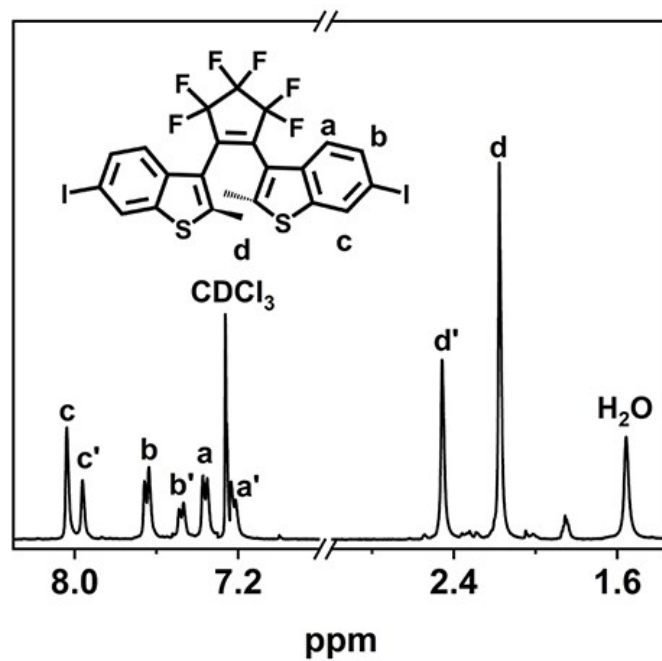

Figure S3.  $^1\text{H}$  NMR spectrum of **4** in  $\text{CDCl}_3$ .

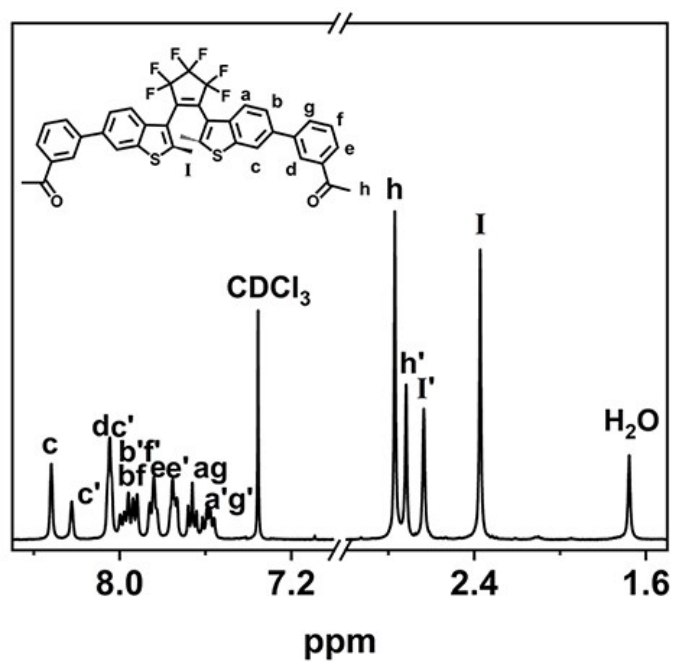

Figure S4.  $^1\text{H}$  NMR spectrum of **5** in  $\text{CDCl}_3$ .

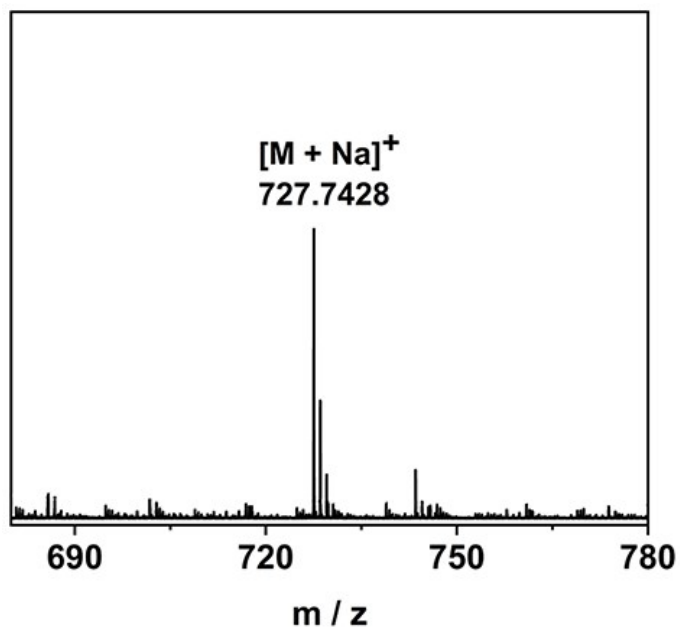

Figure S5. ESI-TOF-MS of 5.

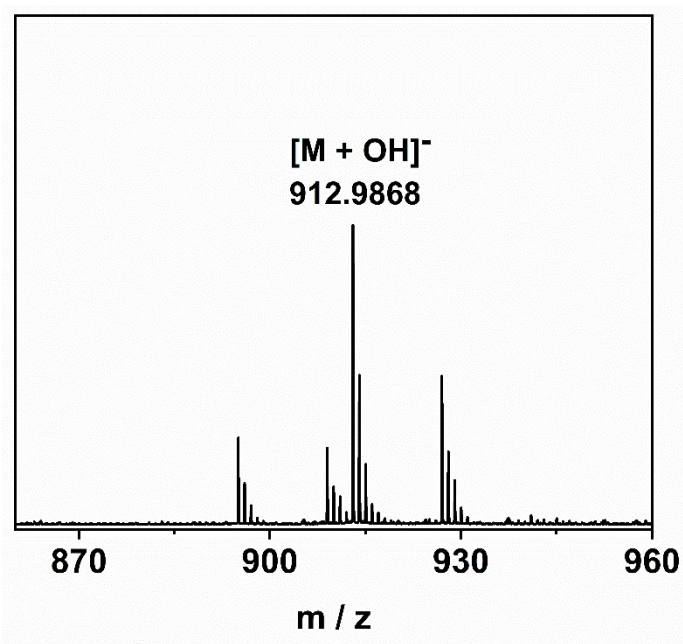

Figure S6. ESI-TOF-MS of L.

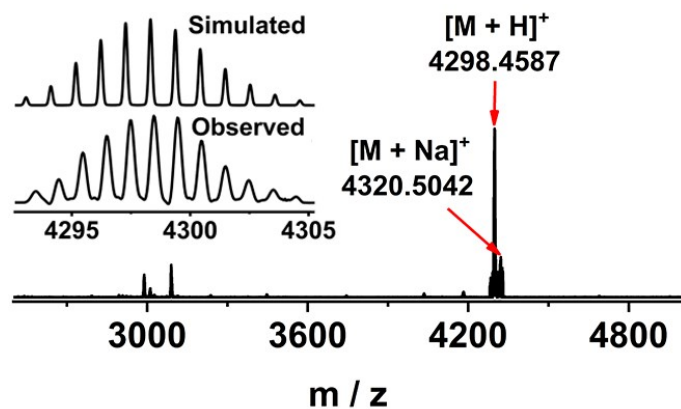

Figure S7. ESI-TOF-MS of  $\text{Eu}_2(\text{o-L})_3(\text{R-BINAPO})_2 (\Delta\Delta\text{-1})$ .

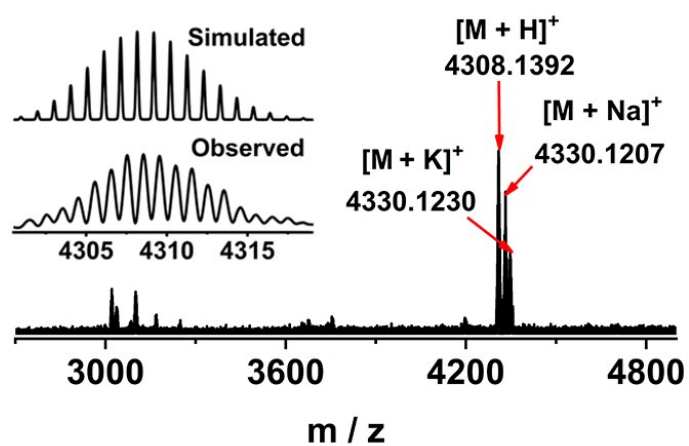

Figure S8. ESI-TOF-MS of  $\text{Gd}_2(\text{o-L})_3(\text{R-BINAPO})_2 (\Delta\Delta\text{-1})$ .

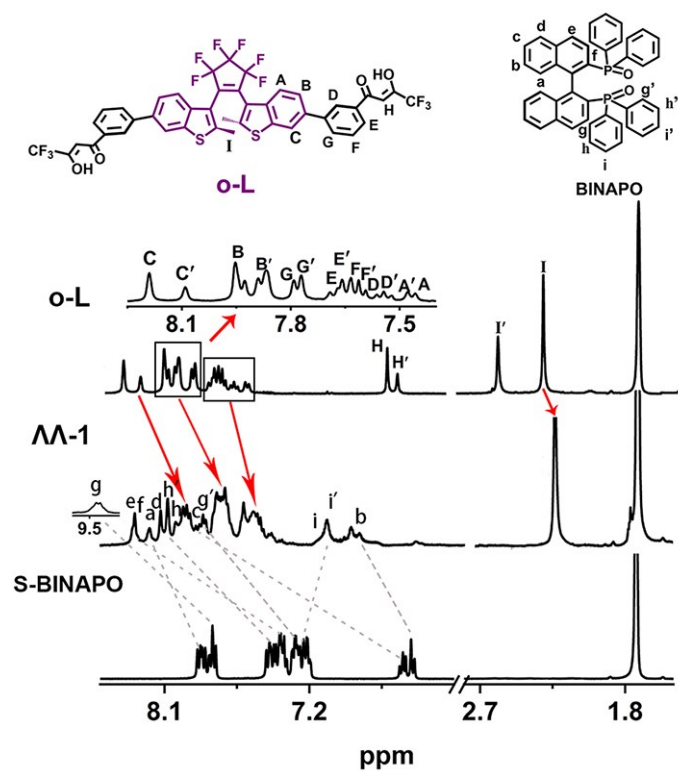

**Figure S9.**  $^1\text{H}$  NMR spectra of **L**, S-BINAPO,  $\text{Eu}_2(\text{o-L})_3(\text{S-BINAPO})_2$  ( $\Delta\Delta\text{-1}$ ) in  $\text{THF-}d_8$ .

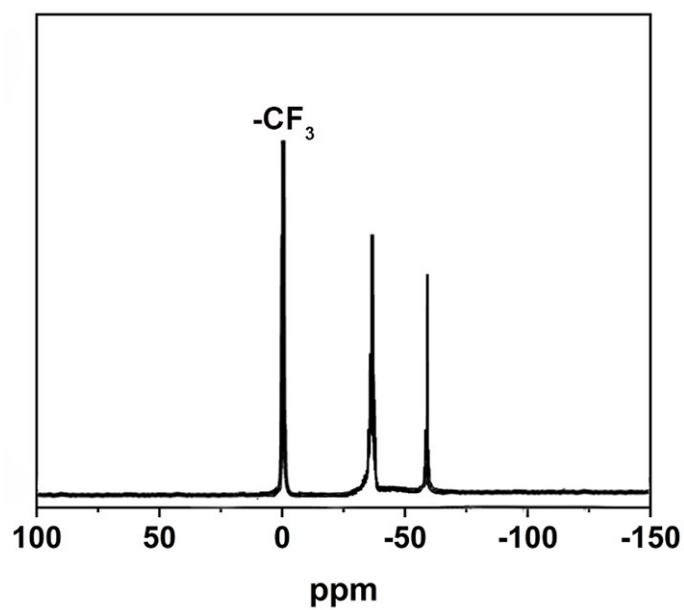

**Figure S10.**  $^{19}\text{F}$  NMR spectrum of  $\text{Eu}_2(\text{o-L})_3(\text{R-BINAPO})_2$  ( $\Delta\Delta\text{-1}$ ) in  $\text{THF-}d_8$ .

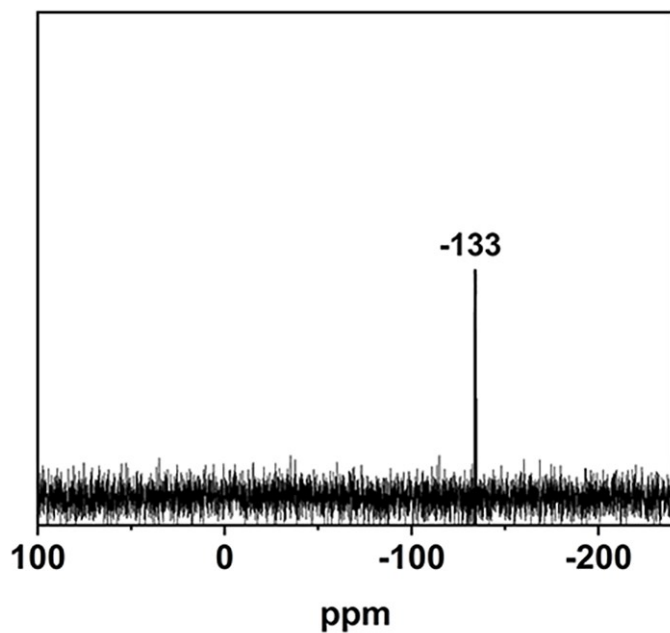

**Figure S11.**  $^{31}\text{P}$  NMR spectrum of  $\text{Eu}_2(\text{o-L})_3(\text{R-BINAPO})_2$  ( $\Delta\Delta\text{-1}$ ) in  $\text{THF-}d_8$ .

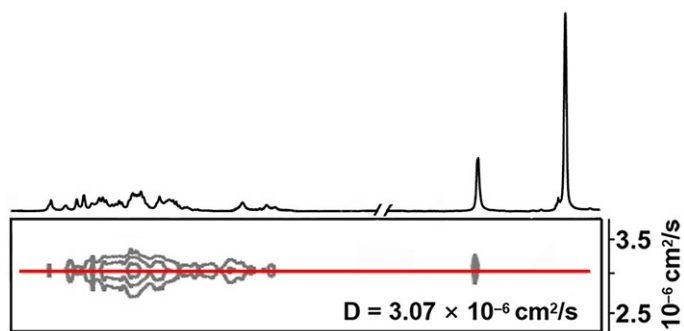

**Figure S12.**  $^1\text{H}$  DOSY spectrum of  $\text{Eu}_2(\text{o-L})_3(\text{S-BINAPO})_2$  ( $\Lambda\Lambda\text{-1}$ ) in  $\text{THF-}d_8$ .

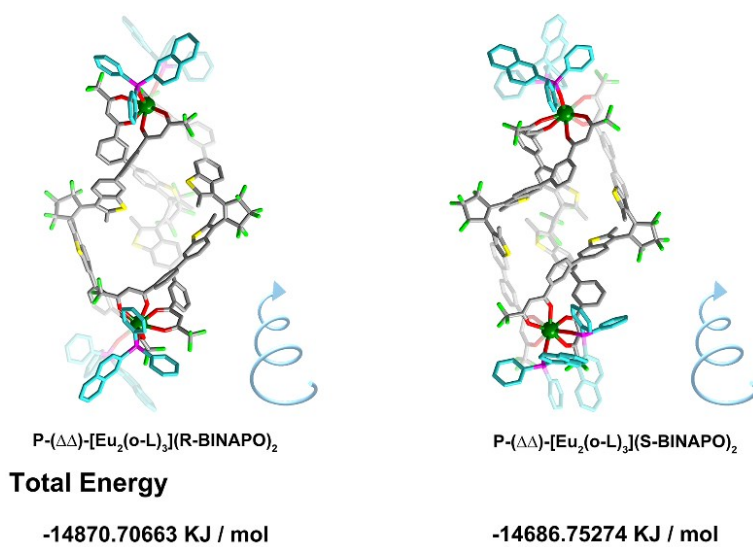

**Figure S13.** *P* in one helicate based on R-BINAPO and S-BINAPO, and the total energy of each

possible helicate. The molecular mechanic modeling was built by using the MOPAC 2016 program implemented in the LUMPAC 3.0 software with a Sparkle/AM1 model.

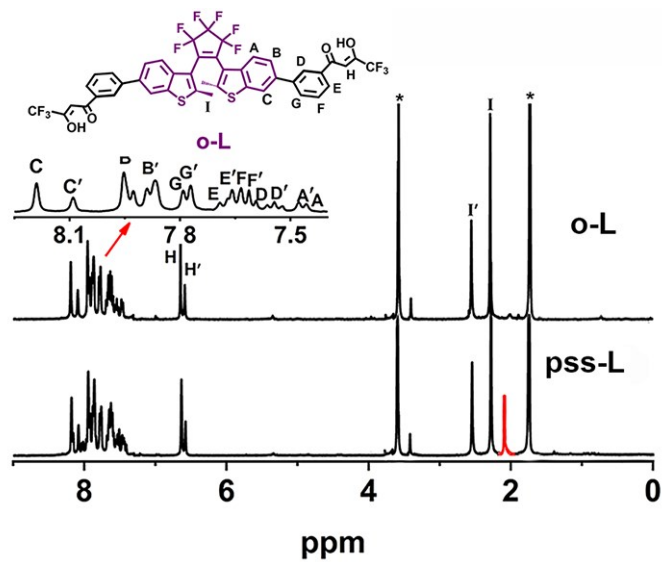

**Figure S14.**  $^1\text{H}$  NMR spectra of o-L and pss-L in  $\text{THF-}d_8$ .

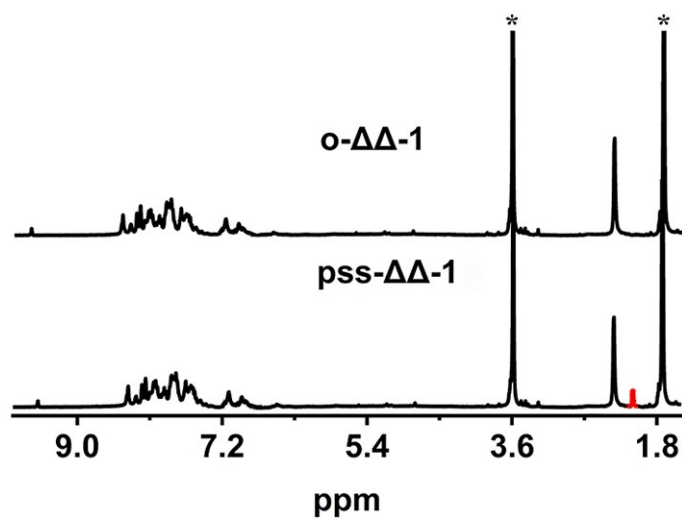

**Figure S15.**  $^1\text{H}$  NMR spectra of  $\text{Eu}_2(\text{o-L})_3(\text{R-BINAPO})_2$  (o- $\Delta\Delta$ -1) and  $\text{Eu}_2(\text{pss-L})_3(\text{R-BINAPO})_2$  (pss- $\Delta\Delta$ -1) in  $\text{THF-}d_8$ .

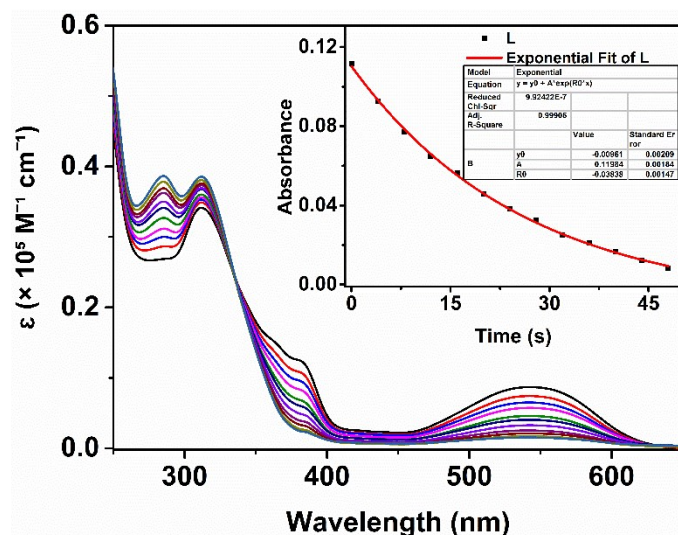

**Figure S16.** UV/Vis spectra changes of **L** in PSS in THF upon irradiation at 526 nm light ( $c = 1.0 \times 10^{-5}$  M,  $I_{526 \text{ nm}} = 0.4 \times 10^{-3}$  W/cm<sup>2</sup>).

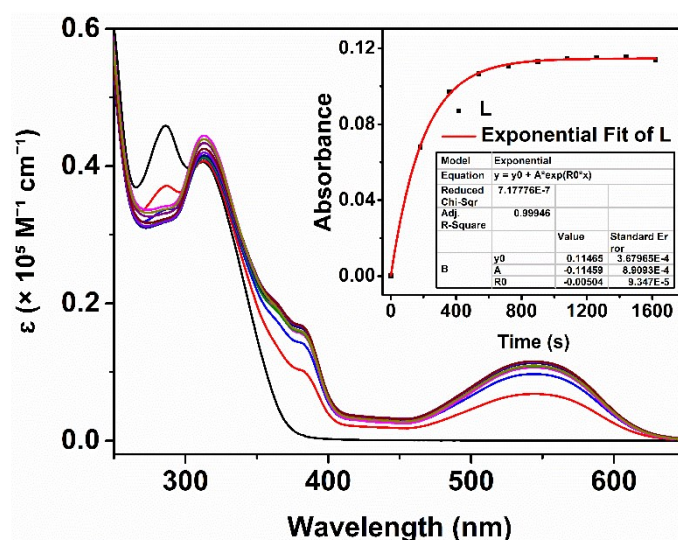

**Figure S17.** UV/Vis spectra changes of **L** in THF upon irradiation at 275 nm light ( $c = 1.0 \times 10^{-5}$  M,  $I_{275} = 1.6 \times 10^{-3}$  W/cm<sup>2</sup>).



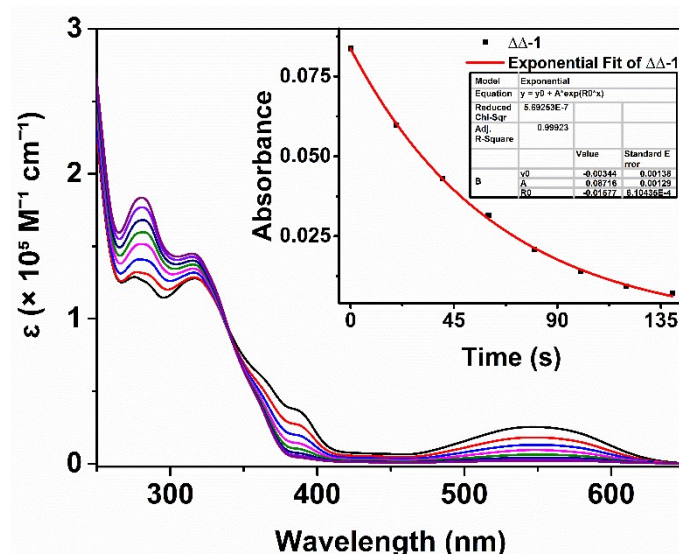

**Figure S18.** UV/Vis spectra changes of  $(Eu_2L_3)(R-BINAPO)_2$  ( $\Delta\Delta-1$ ) in PSS in THF upon irradiation at 526 nm light ( $c = 3.3 \times 10^{-6}$  M,  $I_{526 \text{ nm}} = 0.4 \times 10^{-3}$  W/cm<sup>2</sup>).

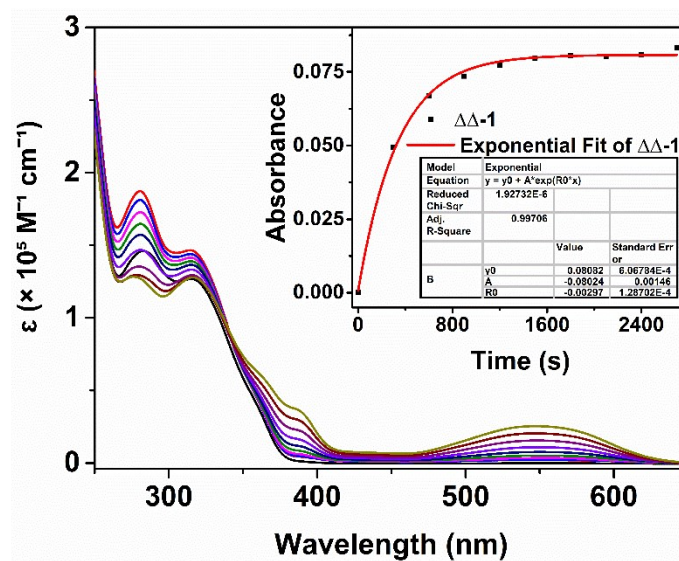

**Figure S19.** UV/Vis spectra changes of  $Eu_2(o-L)_3(R-BINAPO)_2$  ( $\Delta\Delta-1$ ) in THF upon irradiation at 275 nm light ( $c = 3.3 \times 10^{-6}$  M,  $I_{275} = 1.6 \times 10^{-3}$  W/cm<sup>2</sup>).

**Table S1.**  $g_{\text{abs}}$  values for  $\text{Eu}_2\text{L}_3(\text{R-BINAPO})_2$  ( $\Delta\Delta\text{-1}$ ) and  $\text{Eu}_2\text{L}_3(\text{S-BINAPO})_2$  ( $\Lambda\Lambda\text{-1}$ ) after irradiation with UV and visible light

| Complexes                      | $g_{\text{abs}} (\times 10^{-4})$ |                            |                            |                            |                            |
|--------------------------------|-----------------------------------|----------------------------|----------------------------|----------------------------|----------------------------|
|                                | $\lambda = 303 \text{ nm}$        | $\lambda = 336 \text{ nm}$ | $\lambda = 361 \text{ nm}$ | $\lambda = 458 \text{ nm}$ | $\lambda = 548 \text{ nm}$ |
| o- $\Delta\Delta\text{-1}$     | -1.30                             | -0.69                      | -1.01                      | -                          | -                          |
| o- $\Lambda\Lambda\text{-1}$   | 1.34                              | 0.67                       | 1.05                       | -                          | -                          |
| pss- $\Delta\Delta\text{-1}$   | -2.28                             | -0.85                      | -1.11                      | -8.24                      | 1.38                       |
| pss- $\Lambda\Lambda\text{-1}$ | 2.21                              | 0.87                       | 1.09                       | 8.22                       | -1.35                      |

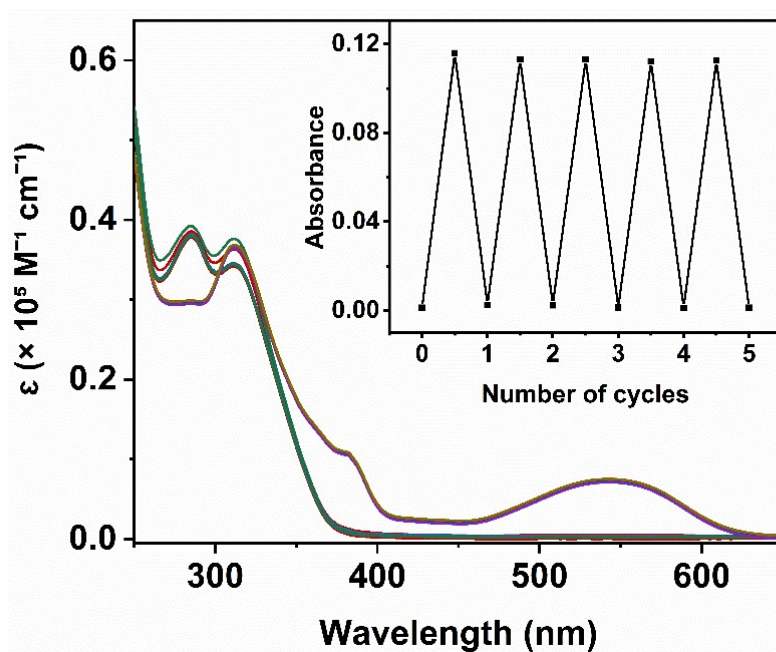

**Figure S20.** UV/Vis absorbance changes of **L** in THF on alternate excitation at 275 and 526 nm after five cycles at 293 K. *Inset:* The absorbance changes at 545 nm upon repeated alternating UV/vis irradiations.

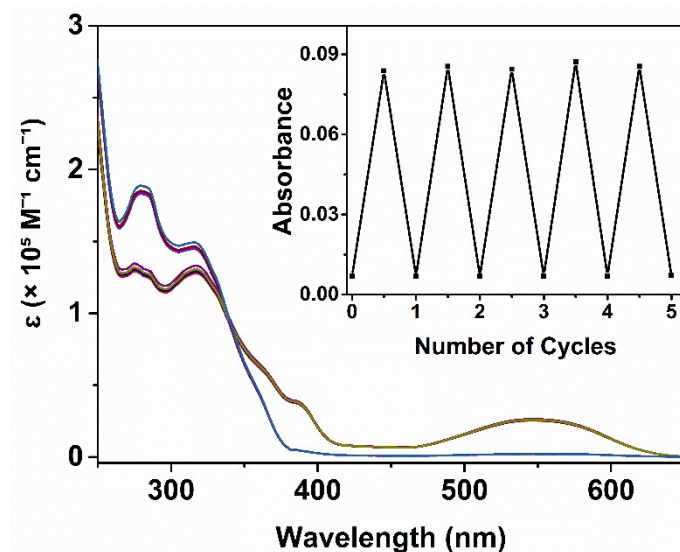

**Figure S21.** UV/Vis absorbance changes of  $(\text{Eu}_2\text{L}_3)(\text{R-BINAPO})_2$  ( $\Delta\Delta\text{-1}$ ) in THF on alternate excitation at 275 and 526 nm after five cycles at 293 K. *Inset:* The absorbance changes at 548 nm upon repeated alternating UV/vis irradiations.

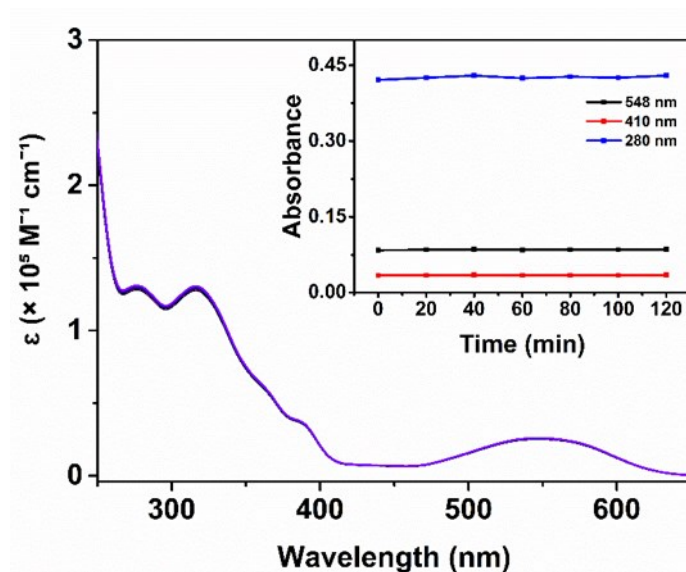

**Figure S22.** UV/Vis spectra of  $(\text{Eu}_2\text{L}_3)(\text{R-BINAPO})_2$  ( $\text{pss-}\Delta\Delta\text{-1}$ ) in PSS at different heating times (55 °C for 2 h in THF); no change was observed in shape and intensity, indicating no back reaction to  $\text{Eu}_2(\text{o-L})_3(\text{R-BINAPO})_2$  ( $\text{o-}\Delta\Delta\text{-1}$ ). *Inset:* Absorbance changes of the open-ring/close-ring mixture monitored at 280, 410, and 548 nm.

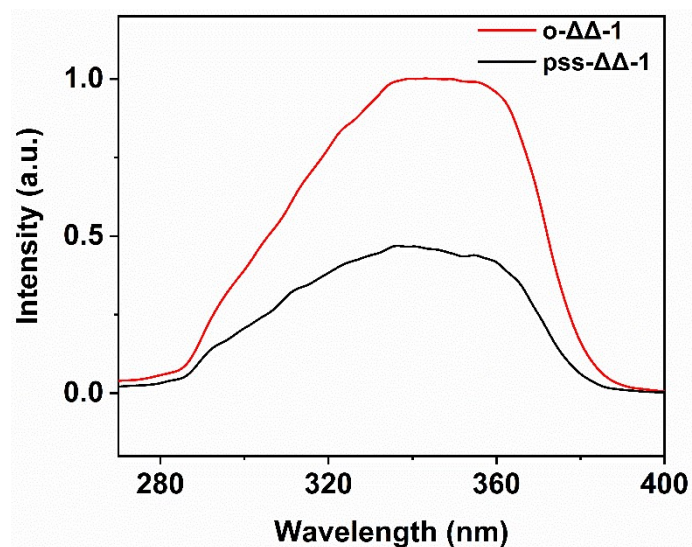

**Figure S23.** Excitation spectra of  $\text{Eu}_2(\text{o-L})_3(\text{R-BINAPO})_2$  (**o- $\Delta\Delta$ -1**) (red line) and  $\text{Eu}_2(\text{pss-L})_3(\text{R-BINAPO})_2$  (**pss- $\Delta\Delta$ -1**) (black line) in THF ( $3.3 \times 10^{-6}$  M).

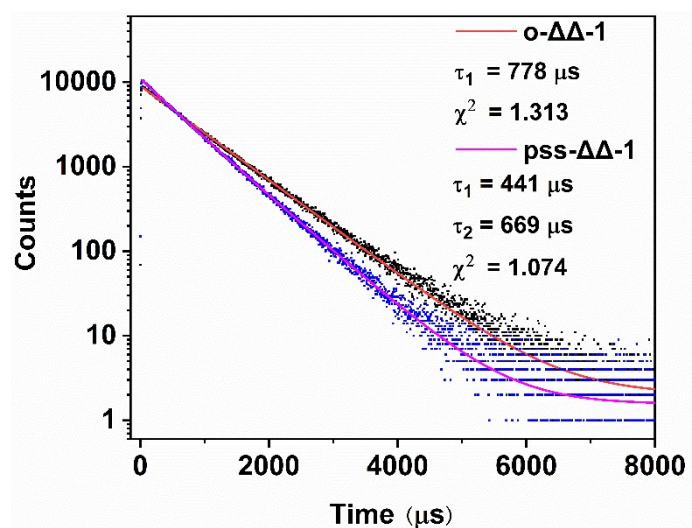

**Figure S24.** Luminescence decay curves of  $\text{Eu}_2(\text{o-L})_3(\text{R-BINAPO})_2$  (**o- $\Delta\Delta$ -1**) (red line) and  $\text{Eu}_2(\text{pss-L})_3(\text{R-BINAPO})_2$  (**pss- $\Delta\Delta$ -1**) (purple line) in THF monitored at 612 nm.

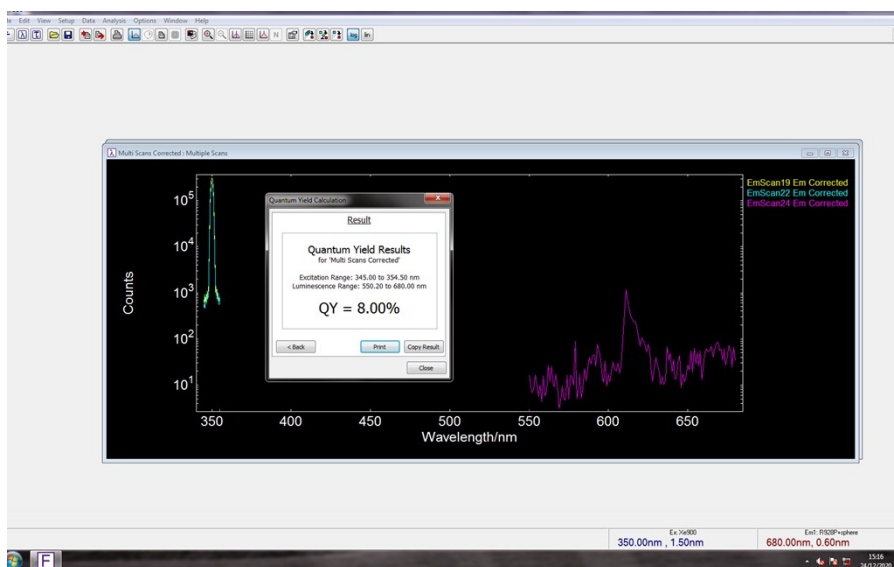

**Figure S25.** The screenshot of the luminescence quantum yield measurement of  $\text{Eu}_2(\text{o-L})_3$  ( $\text{R-BINAPO}_2$ )<sub>2</sub> ( $\text{o-}\Delta\Delta\text{-1}$ ).

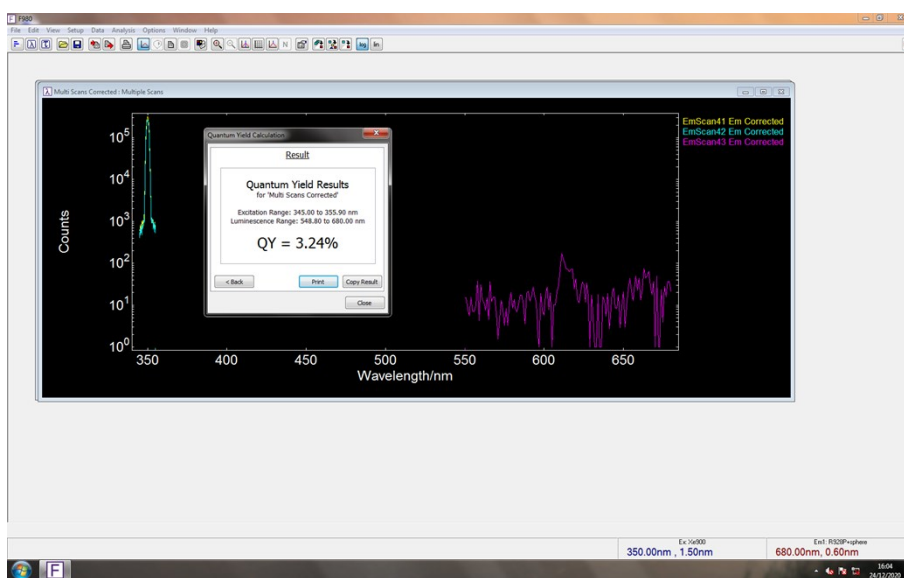

**Figure S26.** The screenshot of the luminescence quantum yield measurement of  $\text{Eu}_2(\text{pss-L})_3$  ( $\text{R-BINAPO}_2$ )<sub>2</sub> ( $\text{pss-}\Delta\Delta\text{-1}$ ).



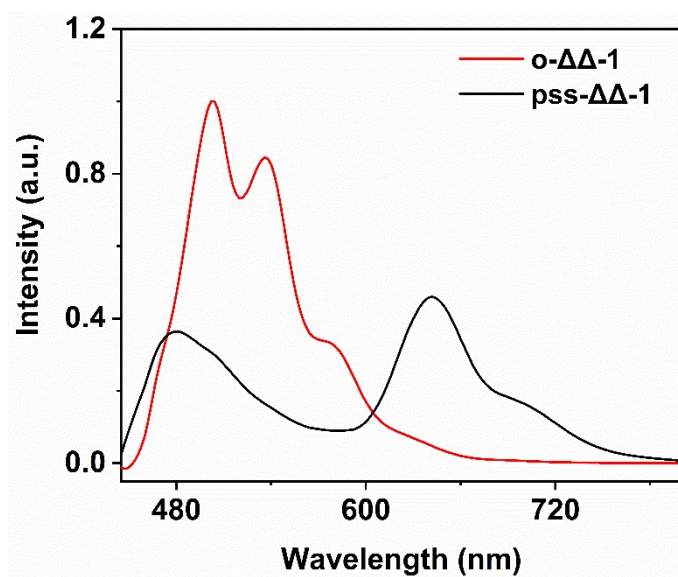

**Figure S27.** Phosphorescence spectra of  $\text{Gd}_2(\text{o-L})_3(\text{R-BINAPO})_2$  (o- $\Delta\Delta$ -1) (red line) and  $\text{Gd}_2(\text{pss-L})_3(\text{R-BINAPO})_2$  (pss- $\Delta\Delta$ -1) (black line) at 77 K in THF.

## Supplementary Notes

### Supplementary Note 1. The cyclization and cycloreversion quantum yields calculation.

The quantum yields of photoisomerization reactions were measured following the reported method (Supplementary Equation 1–7). The kinetics of re-equilibration from an arbitrary initial photostationary state ( $A_0$ ) to a new photostationary state ( $A_{\text{pss}}$ ) dictated by exposure to light of a given wavelength, is monoexponential (Supplementary Figures S16–S19 and Supplementary Equation 1). The rate constant of equilibration ( $\kappa_{\text{eq}}$ ) is given by the sum of the two apparent first-order rate constants defining the overall transition and the equilibrium constant ( $K_{\text{pss}}$ ) by their ratio.  $\kappa_{\text{ex}}$  is the rate constants for absorption at excitation wavelength.  $\sigma_{\text{ex}}$  ( $\text{cm}^2 \text{ molecule}^{-1}$ ) is the absorption cross-section at excitation wavelength  $\lambda_{\text{irr}}$  (nm).  $\psi_{\text{ex}}$  ( $\text{photons s}^{-1} \text{cm}^{-2}$ ) is the photon flux.  $I$  ( $\text{W cm}^{-2}$ ) is the intensity of irradiation light, it is 1.6  $\text{mW/cm}^2$  for 275 nm and 0.4  $\text{mW/cm}^2$  for 526 nm.  $N_A$  is the Avogadro's constant.  $a_{\text{pss}}$  is the fractional population of closed form in PSS under 275 nm irradiation and calculated from  $^1\text{H NMR}$  (Figs. S14 and S15). The concentration for L and  $(\text{Eu}_2\text{L}_3)(\text{R/S-BINAPO})_2$  in THF are  $1.0 \times 10^{-5}$  M and  $3.3 \times 10^{-6}$  M, respectively.

$$A(t) = A_{\text{pss}} + (A_0 - A_{\text{pss}}) e^{-\kappa_{\text{eq}} t} \quad (1)$$

$$\kappa_{\text{eq}} = \kappa_{\text{o} \rightarrow \text{c}} + \kappa_{\text{c} \rightarrow \text{o}}, \quad (2)$$

$$K_{\text{pss}} = [\text{Open form}] / [\text{closed form}] = \kappa_{\text{o} \rightarrow \text{c}} / \kappa_{\text{c} \rightarrow \text{o}} \quad (3)$$

$$a_{\text{pss}} = K_{\text{pss}} / (1 + K_{\text{pss}}) = \kappa_{\text{o} \rightarrow \text{c}} / \kappa_{\text{eq}} \quad (4)$$

$$\kappa_{\text{ex}} = \sigma_{\text{ex}} \psi_{\text{ex}}, \sigma_{\text{ex}} = (10^3 \ln 10 / N_A) \varepsilon_{\text{irr}}, \psi_{\text{ex}} = 5 \times 10^{15} \lambda_{\text{irr}} I \quad (5)$$

$$\Phi_{\text{o} \rightarrow \text{c}} = \kappa_{\text{o} \rightarrow \text{c}} / \kappa_{\text{ex}, \text{o}} \quad (6)$$

$$\Phi_{\text{c} \rightarrow \text{o}} = \kappa_{\text{c} \rightarrow \text{o}} / \kappa_{\text{ex}, \text{c}} \quad (7)$$

## Supplementary Note 2. Computational Details

The ground state geometries of  $\text{Eu}_2(\text{o-L})_3(\text{R-BINAPO})_2$  and  $\text{Eu}_2(\text{o-L})_3(\text{S-BINAPO})_2$  were optimized by calculations using LUMPAC with a Sparkle/AM1 model implemented in the MOPAC 2016 software. The keywords used in the calculation reported here were AM1, PRECISE, BFGS, GNORM = 0.25, GEO-OK, SCFCRT = 1.D-10 (to increase the SCF convergence criterion) and XYZ (for Cartesian coordinates) (Supplementary Fig. 2 and S15).
